# Supplementary material for: Axial ligand engineering for highly efficient oxygen reduction catalysts in transition metal–N4 doped graphene
Source: Royal Society of Chemistry journal article supplement (doi:10.1039/d2nj03058f), 2022-01-01
Supplement: d2nj03058f1.pdf [file d2nj03058f1.pdf]

## New Journal of Chemistry

### Supporting Information

Axial ligand engineering for highly efficient oxygen reduction catalyst in transition metal-N<sub>4</sub> doped graphene

Xuelian She,<sup>ab</sup> Jinghan Gao,<sup>ab</sup> Yan Gao,<sup>c</sup> Hao Tang,<sup>\*c</sup> Kai Li,<sup>\*a</sup> Ying Wang<sup>a</sup> and Zhijian Wu<sup>\*ab</sup>

<sup>a</sup> *State Key Laboratory of Rare Earth Resource Utilization, Changchun Institute of Applied Chemistry, Chinese Academy of Sciences, Changchun 130022, P. R. China.*

<sup>b</sup> *University of Science and Technology of China, Hefei 230026, P. R. China.*

<sup>c</sup> *School of Automation Engineering, University of Electronic Science and Technology of China, Chengdu 611731, P. R. China.*

\* E-mail: [tanghao@uestc.edu.cn](mailto:tanghao@uestc.edu.cn); [likai@ciac.ac.cn](mailto:likai@ciac.ac.cn); [zjwu@ciac.ac.cn](mailto:zjwu@ciac.ac.cn).

Table S1. The total energies (eV) for convergence test with respect to the k-grid sampling size for CrN<sub>4</sub>-Gra, FeN<sub>4</sub>-Gra/ben/NO<sub>2</sub>, RuN<sub>4</sub>-Gra/ben/NO<sub>2</sub> and FeN<sub>4</sub>-Gra/benzene.

| k-grid  | CrN <sub>4</sub> -Gra | FeN <sub>4</sub> -Gra/ben/NO <sub>2</sub> | RuN <sub>4</sub> -Gra/ben/NO <sub>2</sub> | FeN <sub>4</sub> -Gra/benzene |
|---------|-----------------------|-------------------------------------------|-------------------------------------------|-------------------------------|
| 5x5x1   | -450.625              | -537.264                                  | -537.133                                  | -521.731                      |
| 6x6x1   | -450.626              | -537.225                                  | -537.146                                  | -521.731                      |
| 7x7x1   | -450.658              | -537.225                                  | -537.188                                  | -521.733                      |
| 8x8x1   | -450.625              | -537.264                                  | -537.146                                  | -521.731                      |
| 10x10x1 | -450.625              | -537.264                                  | -537.145                                  | -521.732                      |

Table S2. The charge (e<sup>-</sup>) of Cr atom in all the catalysts before (Q1) and after (Q2) the oxygen-containing intermediates are adsorbed.

| Model                                     | Q1   | Q2              |      |      |      |
|-------------------------------------------|------|-----------------|------|------|------|
|                                           |      | *O <sub>2</sub> | *OOH | *O   | *OH  |
| CrN <sub>4</sub> -Gra                     | 1.23 | 1.54            | 1.47 | 1.53 | 1.51 |
| CrN <sub>4</sub> -Gra/O                   | 1.47 | 1.48            | 1.61 | 1.59 | 1.64 |
| CrN <sub>4</sub> -Gra/OH                  | 1.54 | 1.64            | 1.63 | 1.61 | 1.57 |
| CrN <sub>4</sub> -Gra/OOH                 | 1.51 | 1.60            | 1.57 | 1.58 | 1.63 |
| CrN <sub>4</sub> -Gra/ CH                 | 1.34 | 1.30            | 1.36 | 1.32 | 1.44 |
| CrN <sub>4</sub> -Gra/CH <sub>2</sub>     | 1.33 | 1.47            | 1.48 | 1.60 | 1.52 |
| CrN <sub>4</sub> -Gra/CH <sub>3</sub>     | 1.35 | 1.52            | 1.48 | 1.58 | 1.53 |
| CrN <sub>4</sub> -Gra/NH                  | 1.44 | 1.49            | 1.58 | 1.56 | 1.60 |
| CrN <sub>4</sub> -Gra/NH <sub>2</sub>     | 1.45 | 1.57            | 1.55 | 1.60 | 1.54 |
| CrN <sub>4</sub> -Gra/NH <sub>3</sub>     | 1.39 | 1.56            | 1.55 | 1.50 | 1.58 |
| CrN <sub>4</sub> -Gra/ben                 | 1.35 | 1.53            | 1.47 | 1.40 | 1.51 |
| CrN <sub>4</sub> -Gra/ben/NH <sub>2</sub> | 1.38 | 1.54            | 1.50 | 1.59 | 1.52 |
| CrN <sub>4</sub> -Gra/ben/NO <sub>2</sub> | 1.35 | 1.51            | 1.46 | 1.39 | 1.47 |

Table S3. The Cr–O ( $d_{\text{Cr-O}}$ ) bond distances between Cr and O in adsorbed  $\text{O}_2$ , and the adsorption energies  $\Delta E_{\text{ads}}$  (eV) for the most stable ORR intermediates for the studied catalysts.

|                                           | $d_{\text{Cr-O}}(\text{\AA})$ | * $\text{O}_2$ | *O    | *OH   | *OOH  | *H    | * $\text{H}_2\text{O}$ | *HOOH              |
|-------------------------------------------|-------------------------------|----------------|-------|-------|-------|-------|------------------------|--------------------|
| CrN <sub>4</sub> -Gra                     | 1.85                          | -2.13          | -5.90 | -3.68 | -2.30 | -1.57 | -0.30                  | O+H <sub>2</sub> O |
| CrN <sub>4</sub> -Gra/O                   | 3.11                          | -0.20          | -3.08 | -2.01 | -0.65 | -1.41 | -0.17                  | -0.20              |
| CrN <sub>4</sub> -Gra/OH                  | 1.91                          | -0.89          | -4.33 | -2.84 | -1.52 | -1.46 | -0.35                  | -0.39              |
| CrN <sub>4</sub> -Gra/OOH                 | 1.90                          | -0.92          | -4.45 | -2.94 | -1.56 | -1.49 | -0.30                  | -0.39              |
| CrN <sub>4</sub> -Gra/CH                  | 2.89                          | -0.25          | -3.02 | -1.93 | -0.67 | -1.37 | -0.18                  | -0.26              |
| CrN <sub>4</sub> -Gra/CH <sub>2</sub>     | 1.94                          | -0.45          | -3.34 | -2.28 | -0.97 | -1.50 | -0.22                  | -0.31              |
| CrN <sub>4</sub> -Gra/CH <sub>3</sub>     | 1.91                          | -0.96          | -4.06 | -3.59 | -1.32 | -1.51 | -0.30                  | -0.36              |
| CrN <sub>4</sub> -Gra/NH                  | 3.20                          | -0.22          | -3.08 | -2.25 | -0.90 | -1.37 | -0.19                  | -0.22              |
| CrN <sub>4</sub> -Gra/NH <sub>2</sub>     | 1.90                          | -0.82          | -4.21 | -2.86 | -1.56 | -1.43 | -0.30                  | -0.37              |
| CrN <sub>4</sub> -Gra/NH <sub>3</sub>     | 1.87                          | -1.77          | -5.41 | -3.70 | -2.31 | -1.54 | -0.52                  | O+H <sub>2</sub> O |
| CrN <sub>4</sub> -Gra/ben                 | 1.91                          | -0.83          | -3.91 | -2.57 | -1.25 | -1.49 | -0.30                  | -0.35              |
| CrN <sub>4</sub> -Gra/ben/NH <sub>2</sub> | 1.91                          | -0.79          | -3.89 | -2.57 | -1.27 | -1.48 | -0.28                  | -0.35              |
| CrN <sub>4</sub> -Gra/ben/NO <sub>2</sub> | 1.91                          | -0.76          | -3.90 | -2.57 | -1.34 | -1.50 | -0.32                  | -0.33              |

Table S4. Adsorption energies  $\Delta E_{\text{ads}}$  (eV) for the most stable ORR intermediates and Gibbs adsorption free energies of the oxygenated intermediates ( $\Delta G^{*\text{OOH}}$ ,  $\Delta G^{*\text{O}}$ , and  $\Delta G^{*\text{OH}}$ ) and overpotentials ( $\eta$ ) for  $\text{MN}_4\text{-Gra/CH}_3$  catalysts.

|                                                    | $E_{\text{ads}}$ (eV) |       |       | $\Delta G$ (eV) |      | $\eta$ (V) |      |
|----------------------------------------------------|-----------------------|-------|-------|-----------------|------|------------|------|
|                                                    | *O                    | *OH   | *OOH  | *OOH            | *O   |            | *OH  |
| ScN <sub>4</sub> -Gra/CH <sub>3</sub> <sup>a</sup> | -3.06                 | -1.10 | -     | -               | -    | -          | -    |
| TiN <sub>4</sub> -Gra/CH <sub>3</sub> <sup>b</sup> | -                     | -     | -1.23 | -               | -    | -          | -    |
| VN <sub>4</sub> -Gra/CH <sub>3</sub> <sup>c</sup>  | -                     | -2.90 | -1.47 | -               | -    | -          | -    |
| CrN <sub>4</sub> -Gra/CH <sub>3</sub>              | -4.06                 | -3.59 | -1.32 | 4.02            | 1.76 | 0.86       | 0.37 |
| MnN <sub>4</sub> -Gra/CH <sub>3</sub>              | -3.63                 | -2.58 | -1.34 | 3.99            | 2.22 | 0.96       | 0.30 |
| FeN <sub>4</sub> -Gra/CH <sub>3</sub>              | -3.46                 | -4.05 | -2.63 | 4.01            | 2.37 | 1.06       | 0.32 |
| CoN <sub>4</sub> -Gra/CH <sub>3</sub>              | -2.87                 | -2.12 | -0.94 | 4.38            | 3.04 | 1.40       | 0.69 |
| NiN <sub>4</sub> -Gra/CH <sub>3</sub>              | -2.91                 | -2.19 | -0.99 | 4.31            | 2.99 | 1.34       | 0.62 |
| CuN <sub>4</sub> -Gra/CH <sub>3</sub>              | -2.77                 | -1.69 | -0.51 | 4.83            | 3.13 | 1.84       | 1.14 |
| ZnN <sub>4</sub> -Gra/CH <sub>3</sub> <sup>d</sup> | -                     | -0.75 | -     | -               | -    | -          | -    |
| RuN <sub>4</sub> -Gra/CH <sub>3</sub>              | -3.76                 | -2.77 | -1.62 | 3.73            | 2.08 | 0.79       | 0.44 |
| RhN <sub>4</sub> -Gra/CH <sub>3</sub>              | -3.02                 | -2.28 | -1.14 | 4.16            | 2.88 | 1.23       | 0.47 |
| PdN <sub>4</sub> -Gra/CH <sub>3</sub>              | -3.12                 | -2.62 | -1.38 | 3.94            | 2.78 | 0.88       | 0.35 |
| IrN <sub>4</sub> -Gra/CH <sub>3</sub>              | -2.91                 | -2.53 | -0.98 | 4.32            | 2.91 | 0.95       | 0.63 |
| PtN <sub>4</sub> -Gra/CH <sub>3</sub>              | -2.81                 | -2.95 | -1.27 | 4.00            | 3.06 | 0.57       | 0.66 |

<sup>a</sup>\*OOH was not adsorbed on the ScN<sub>4</sub>-Gra/CH<sub>3</sub>.

<sup>b</sup>The ligand CH<sub>3</sub> falls off when \*O and \*OH were adsorbed on the TiN<sub>4</sub>-Gra/CH<sub>3</sub>, respectively.

<sup>c</sup>The ligand CH<sub>3</sub> falls off when \*O was adsorbed on the VN<sub>4</sub>-Gra/CH<sub>3</sub>.

<sup>d</sup>\*O and \*OOH were not adsorbed on the ZnN<sub>4</sub>-Gra/CH<sub>3</sub>.

Table S5. Adsorption energies  $\Delta E_{\text{ads}}$  (eV) for the most stable ORR intermediates and Gibbs adsorption free energies of the oxygenated intermediates ( $\Delta G^{*\text{OOH}}$ ,  $\Delta G^{*\text{O}}$ , and  $\Delta G^{*\text{OH}}$ ) and overpotentials ( $\eta$ ) for  $\text{MN}_4\text{-Gra/ben/NO}_2$  catalysts.

|                                               | $E_{\text{ads}}$ (eV) |       |       | $\Delta G$ (eV) |      | $\eta$ (V) |      |
|-----------------------------------------------|-----------------------|-------|-------|-----------------|------|------------|------|
|                                               | *O                    | *OH   | *OOH  | *OOH            | *O   |            | *OH  |
| $\text{ScN}_4\text{-Gra/ben/NO}_2^{\text{a}}$ | -3.02                 | -1.11 | -     | -               | -    | -          | -    |
| $\text{TiN}_4\text{-Gra/ben/NO}_2^{\text{b}}$ | -                     | -     | -     | -               | -    | -          | -    |
| $\text{VN}_4\text{-Gra/ben/NO}_2^{\text{c}}$  | -                     | -     | -1.47 | -               | -    | -          | -    |
| $\text{CrN}_4\text{-Gra/ben/NO}_2$            | -3.90                 | -2.57 | -1.34 | 3.98            | 1.93 | 0.96       | 0.29 |
| $\text{MnN}_4\text{-Gra/ben/NO}_2$            | -3.44                 | -2.54 | -1.27 | 4.06            | 2.40 | 1.01       | 0.37 |
| $\text{FeN}_4\text{-Gra/ben/NO}_2$            | -3.44                 | -2.51 | -1.46 | 3.90            | 2.40 | 1.03       | 0.21 |
| $\text{CoN}_4\text{-Gra/ben/NO}_2$            | -2.77                 | -2.06 | -0.86 | 4.47            | 3.14 | 1.46       | 0.78 |
| $\text{NiN}_4\text{-Gra/ben/NO}_2$            | -2.75                 | -2.01 | -0.82 | 4.51            | 3.15 | 1.35       | 0.82 |
| $\text{CuN}_4\text{-Gra/ben/NO}_2$            | -2.69                 | -1.34 | -0.25 | 5.00            | 3.22 | 2.20       | 1.31 |
| $\text{ZnN}_4\text{-Gra/ben/NO}_2^{\text{d}}$ | -2.74                 | -     | -     | -               | -    | -          | -    |
| $\text{RuN}_4\text{-Gra/ben/NO}_2$            | -3.40                 | -2.58 | -1.55 | 3.80            | 2.42 | 0.97       | 0.26 |
| $\text{RhN}_4\text{-Gra/ben/NO}_2$            | -2.96                 | -2.31 | -1.17 | 4.12            | 2.95 | 1.20       | 0.43 |
| $\text{PdN}_4\text{-Gra/ben/NO}_2$            | -3.00                 | -2.54 | -1.32 | 4.00            | 2.91 | 0.95       | 0.31 |
| $\text{IrN}_4\text{-Gra/ben/NO}_2$            | -2.85                 | -2.60 | -1.11 | 4.21            | 2.96 | 0.92       | 0.52 |
| $\text{PtN}_4\text{-Gra/ben/NO}_2$            | -2.71                 | -2.96 | -1.30 | 4.03            | 3.17 | 0.58       | 0.65 |

<sup>a</sup>\*OOH was not adsorbed on the  $\text{ScN}_4\text{-Gra/ben/NO}_2$ .

<sup>b</sup>The ligand ben/NO<sub>2</sub> falls off when \*O, \*OH and \*OOH were adsorbed on the  $\text{TiN}_4\text{-Gra/ben/NO}_2$ , respectively.

<sup>c</sup>The ligand ben/NO<sub>2</sub> falls off when \*O and \*OH were adsorbed on the  $\text{VN}_4\text{-Gra/ben/NO}_2$ , respectively.

<sup>d</sup>\*OH and \*OOH were not adsorbed on the  $\text{ZnN}_4\text{-Gra/ben/NO}_2$ .

Table S6. Adsorption energies  $\Delta E_{\text{ads}}$  (eV) for the most stable ORR intermediates and Gibbs adsorption free energies of the oxygenated intermediates ( $\Delta G^{*\text{OOH}}$ ,  $\Delta G^{*\text{O}}$ , and  $\Delta G^{*\text{OH}}$ ) and overpotentials ( $\eta$ ) for  $\text{MN}_4\text{-Gra/ben}$  catalysts.

|                                        | $E_{\text{ads}}$ (eV) |       |       | $\Delta G$ (eV) |      | $\eta$ (V) |      |
|----------------------------------------|-----------------------|-------|-------|-----------------|------|------------|------|
|                                        | *O                    | *OH   | *OOH  | *OOH            | *O   |            | *OH  |
| ScN <sub>4</sub> -Gra/ben <sup>a</sup> | -3.06                 | -1.12 | -     | -               | -    | -          | -    |
| TiN <sub>4</sub> -Gra/ben <sup>b</sup> | -                     | -     | -1.14 | -               | -    | -          | -    |
| VN <sub>4</sub> -Gra/ben <sup>c</sup>  | -                     | -2.78 | -1.39 | -               | -    | -          | -    |
| CrN <sub>4</sub> -Gra/ben              | -3.91                 | -2.57 | -1.25 | 4.04            | 1.93 | 0.96       | 0.35 |
| MnN <sub>4</sub> -Gra/ben              | -3.47                 | -2.56 | -1.28 | 4.03            | 2.36 | 0.98       | 0.34 |
| FeN <sub>4</sub> -Gra/ben              | -3.53                 | -2.59 | -1.46 | 3.88            | 2.31 | 0.95       | 0.28 |
| CoN <sub>4</sub> -Gra/ben              | -2.84                 | -2.10 | -0.89 | 4.40            | 3.07 | 1.42       | 0.71 |
| NiN <sub>4</sub> -Gra/ben              | -2.84                 | -2.08 | -0.71 | 4.60            | 3.06 | 1.45       | 0.90 |
| CuN <sub>4</sub> -Gra/ben <sup>d</sup> | -2.74                 | -1.45 | -     | -               | -    | -          | -    |
| ZnN <sub>4</sub> -Gra/ben <sup>e</sup> | -2.76                 | -     | -     | -               | -    | -          | -    |
| RuN <sub>4</sub> -Gra/ben              | -3.55                 | -2.62 | -1.53 | 3.83            | 2.30 | 0.91       | 0.32 |
| RhN <sub>4</sub> -Gra/ben              | -3.03                 | -2.34 | -1.14 | 4.23            | 2.88 | 1.19       | 0.54 |
| PdN <sub>4</sub> -Gra/ben              | -3.08                 | -2.60 | -1.36 | 3.98            | 2.83 | 0.91       | 0.32 |
| IrN <sub>4</sub> -Gra/ben              | -2.93                 | -2.60 | -1.06 | 4.21            | 2.89 | 0.92       | 0.52 |
| PtN <sub>4</sub> -Gra/ben              | -2.80                 | -2.96 | -1.27 | 4.02            | 3.07 | 0.55       | 0.68 |

<sup>a</sup>\*OOH was not adsorbed on the ScN<sub>4</sub>-Gra/ben.

<sup>b</sup>The ligand ben falls off when \*O and \*OH were adsorbed on the TiN<sub>4</sub>-Gra/ben, respectively.

<sup>c</sup>The ligand ben falls off when \*O was adsorbed on the VN<sub>4</sub>-Gra/ben.

<sup>d</sup>\*OOH was not adsorbed on the CuN<sub>4</sub>-Gra/ben.

<sup>e</sup>\*OH and \*OOH were not adsorbed on the ZnN<sub>4</sub>-Gra/ben.

Table S7. Adsorption energies  $\Delta E_{\text{ads}}$  (eV) for the most stable ORR intermediates and Gibbs adsorption free energies of the oxygenated intermediates ( $\Delta G^{*\text{OOH}}$ ,  $\Delta G^{*\text{O}}$ , and  $\Delta G^{*\text{OH}}$ ) and overpotentials ( $\eta$ ) for  $\text{MN}_4\text{-Gra/ben/NH}_2$  catalysts.

|                                               | $E_{\text{ads}}$ (eV) |       |       | $\Delta G$ (eV) |      | $\eta$ (V) |      |
|-----------------------------------------------|-----------------------|-------|-------|-----------------|------|------------|------|
|                                               | *O                    | *OH   | *OOH  | *OOH            | *O   |            | *OH  |
| $\text{ScN}_4\text{-Gra/ben/NH}_2^{\text{a}}$ | -3.09                 | -1.13 | -     | -               | -    | -          | -    |
| $\text{TiN}_4\text{-Gra/ben/NH}_2^{\text{b}}$ | -                     | -     | -1.05 | -               | -    | -          | -    |
| $\text{VN}_4\text{-Gra/ben/NH}_2^{\text{c}}$  | -                     | -2.69 | -1.20 | -               | -    | -          | -    |
| $\text{CrN}_4\text{-Gra/ben/NH}_2$            | -3.89                 | -2.57 | -1.27 | 4.06            | 1.94 | 0.96       | 0.37 |
| $\text{MnN}_4\text{-Gra/ben/NH}_2$            | -3.51                 | -2.61 | -1.31 | 4.00            | 2.34 | 0.92       | 0.32 |
| $\text{FeN}_4\text{-Gra/ben/NH}_2$            | -3.36                 | -2.44 | -1.27 | 4.06            | 2.48 | 1.11       | 0.37 |
| $\text{CoN}_4\text{-Gra/ben/NH}_2$            | -2.85                 | -2.13 | -0.90 | 4.47            | 3.06 | 1.40       | 0.78 |
| $\text{NiN}_4\text{-Gra/ben/NH}_2$            | -2.87                 | -2.13 | -0.97 | 4.37            | 3.03 | 1.42       | 0.68 |
| $\text{CuN}_4\text{-Gra/ben/NH}_2^{\text{d}}$ | -2.73                 | -1.47 | -     | -               | -    | -          | -    |
| $\text{ZnN}_4\text{-Gra/ben/NH}_2^{\text{e}}$ | -2.59                 | -     | -     | -               | -    | -          | -    |
| $\text{RuN}_4\text{-Gra/ben/NH}_2$            | -3.61                 | -2.67 | -1.54 | 3.80            | 2.23 | 0.87       | 0.36 |
| $\text{RhN}_4\text{-Gra/ben/NH}_2$            | -3.04                 | -2.37 | -1.14 | 4.16            | 2.86 | 1.15       | 0.47 |
| $\text{PdN}_4\text{-Gra/ben/NH}_2$            | -3.12                 | -2.65 | -1.39 | 4.00            | 2.78 | 0.88       | 0.35 |
| $\text{IrN}_4\text{-Gra/ben/NH}_2$            | -3.00                 | -2.66 | -1.08 | 4.21            | 2.82 | 0.87       | 0.53 |
| $\text{PtN}_4\text{-Gra/ben/NH}_2$            | -2.83                 | -2.99 | -1.34 | 3.99            | 3.05 | 0.52       | 0.71 |

<sup>a</sup>\*OOH was not adsorbed on the  $\text{ScN}_4\text{-Gra/ben/NH}_2$ .

<sup>b</sup>The ligand ben/NH<sub>2</sub> falls off when \*O and \*OH were adsorbed on the  $\text{TiN}_4\text{-Gra/ben/NH}_2$ , respectively.

<sup>c</sup>The ligand ben/NH<sub>2</sub> falls off when \*O was adsorbed on the  $\text{VN}_4\text{-Gra/ben/NH}_2$ .

<sup>d</sup>\*OOH was not adsorbed on the  $\text{CuN}_4\text{-Gra/ben/NH}_2$ .

<sup>e</sup>\*OH and \*OOH were not adsorbed on the  $\text{ZnN}_4\text{-Gra/ben/NH}_2$ .

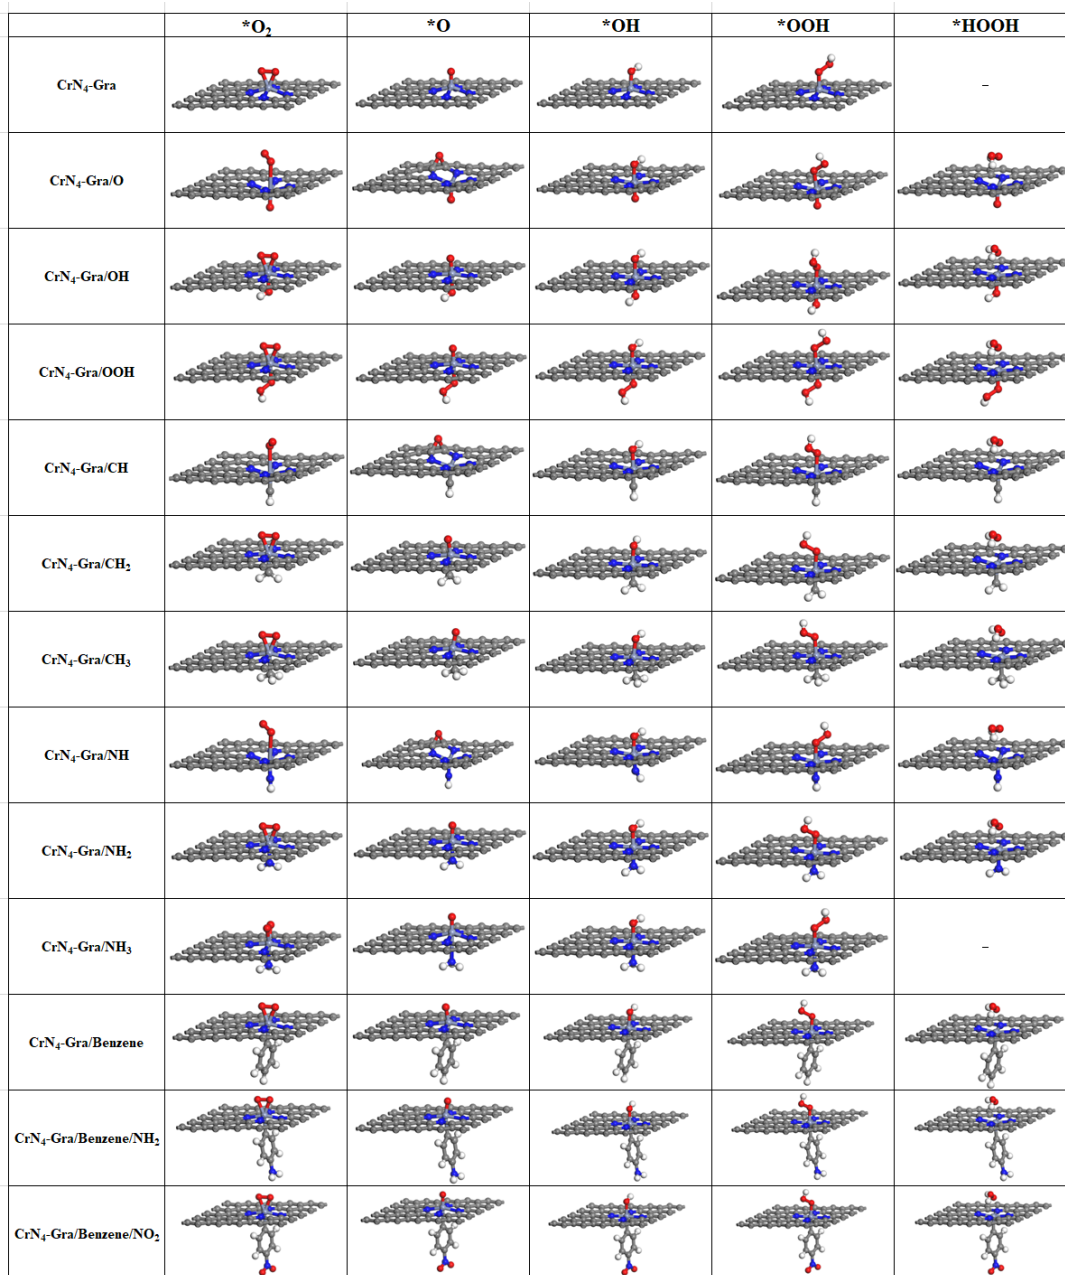

Figure S1. The optimized structures of O<sub>2</sub>, \*O, \*OH, \*OOH and HOOH intermediates on the CrN<sub>4</sub>-Gra surfaces with different axial ligands.



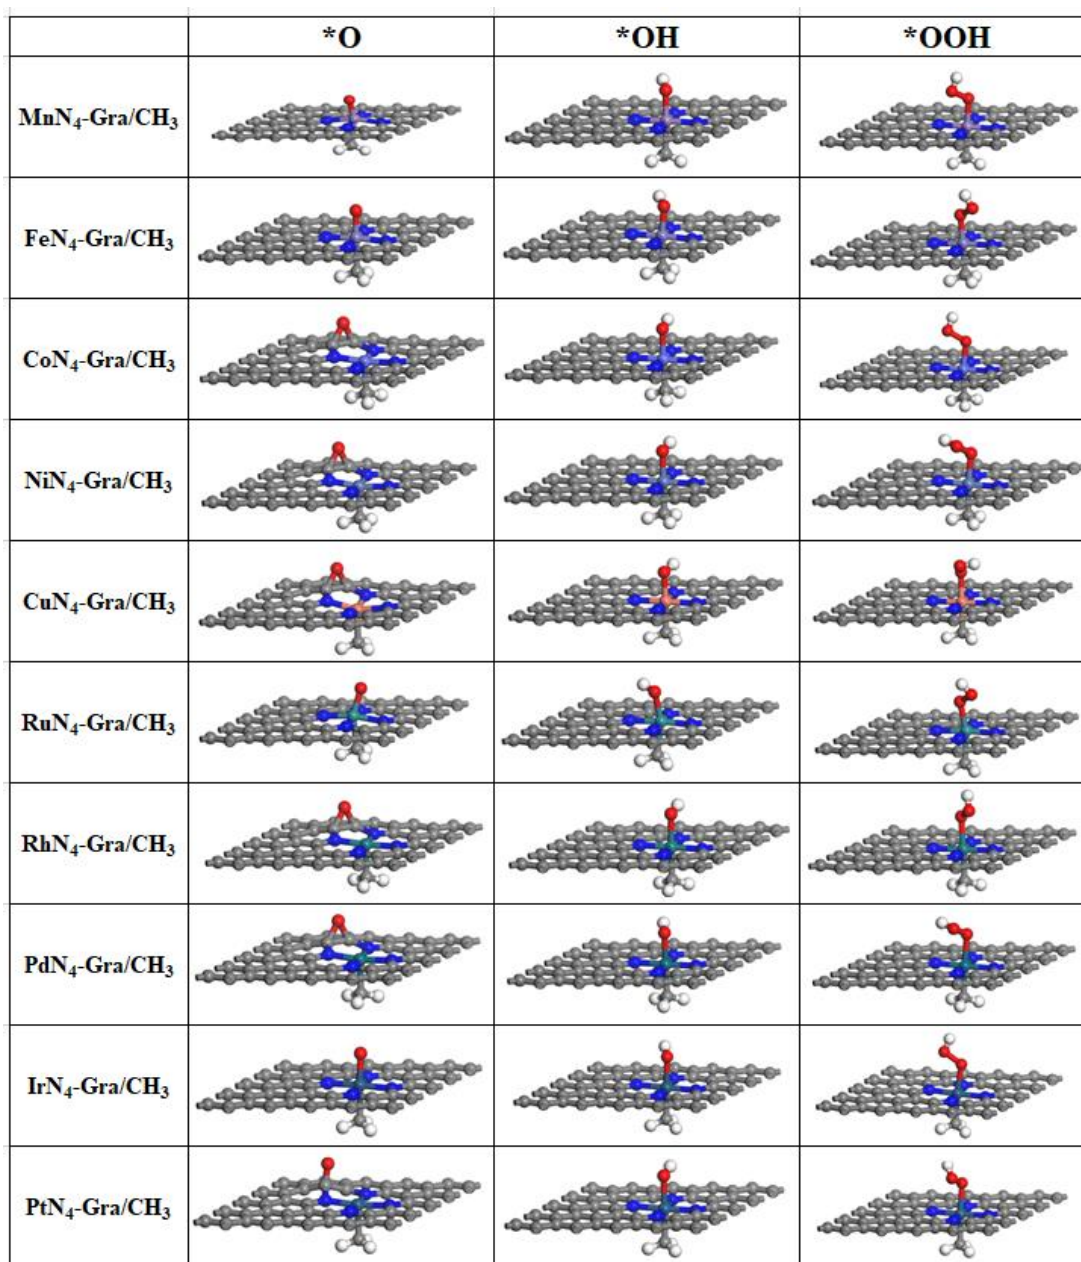

Figure S2. The optimized structures of \*O, \*OH and \*OOH intermediates on the MN<sub>4</sub>-Gra/CH<sub>3</sub> surfaces.

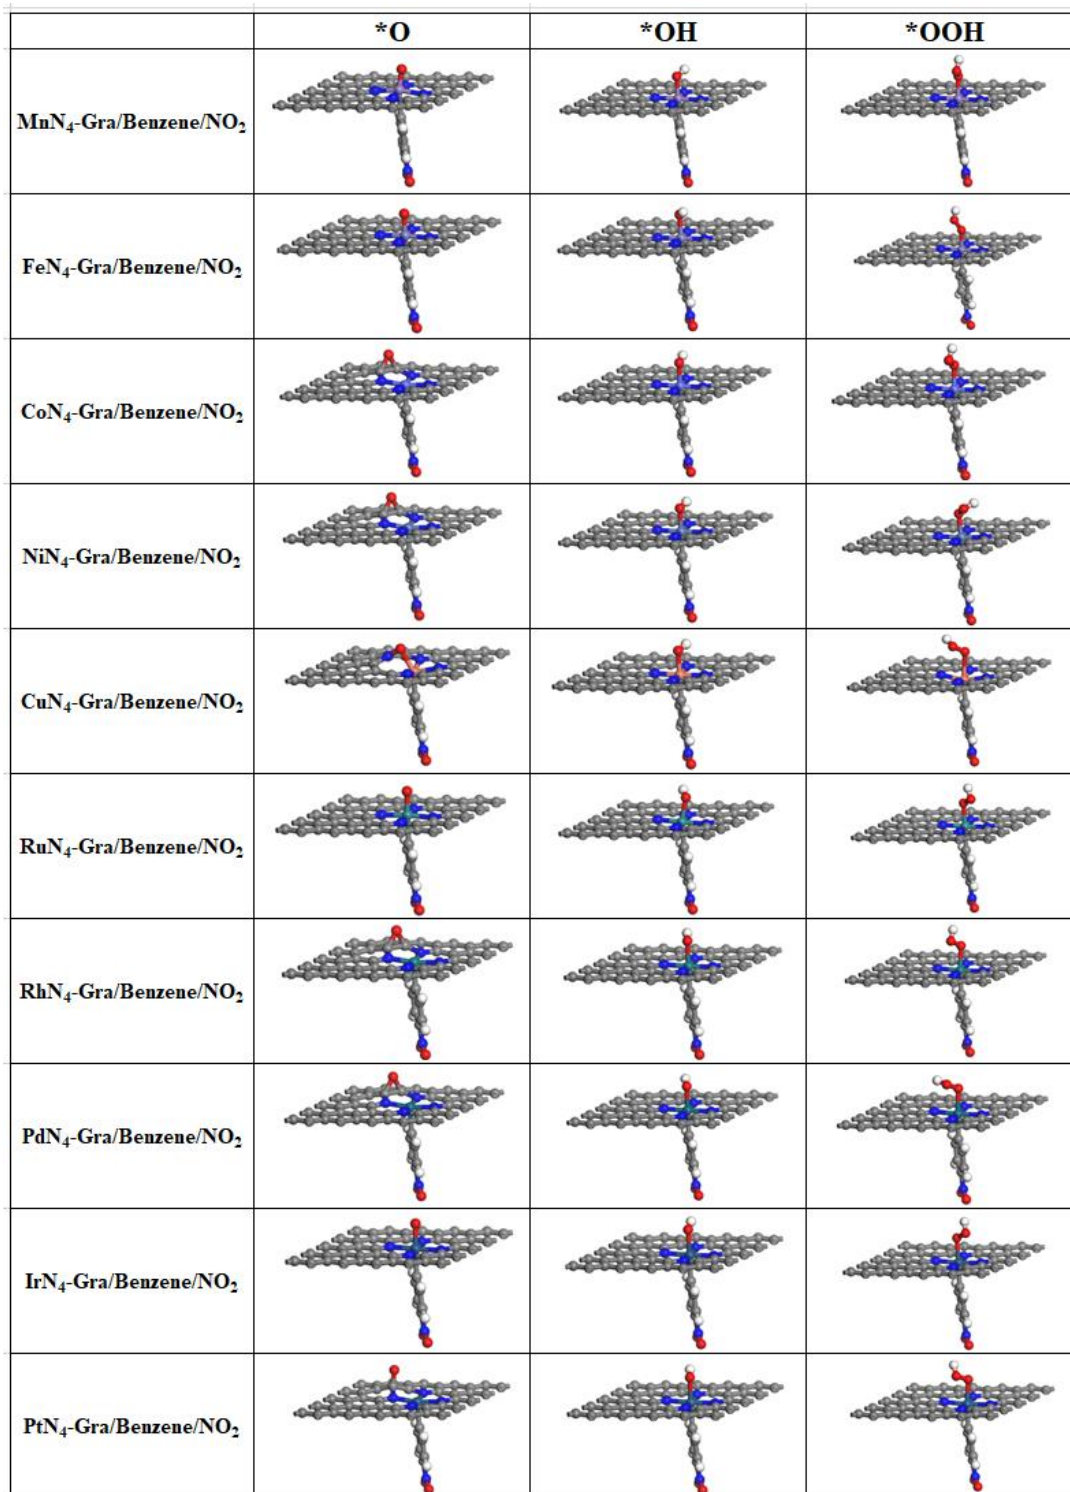

Figure S3. The optimized structures of \*O, \*OH and \*OOH intermediates on the MN<sub>4</sub>-Gra/ben/NO<sub>2</sub> surfaces.

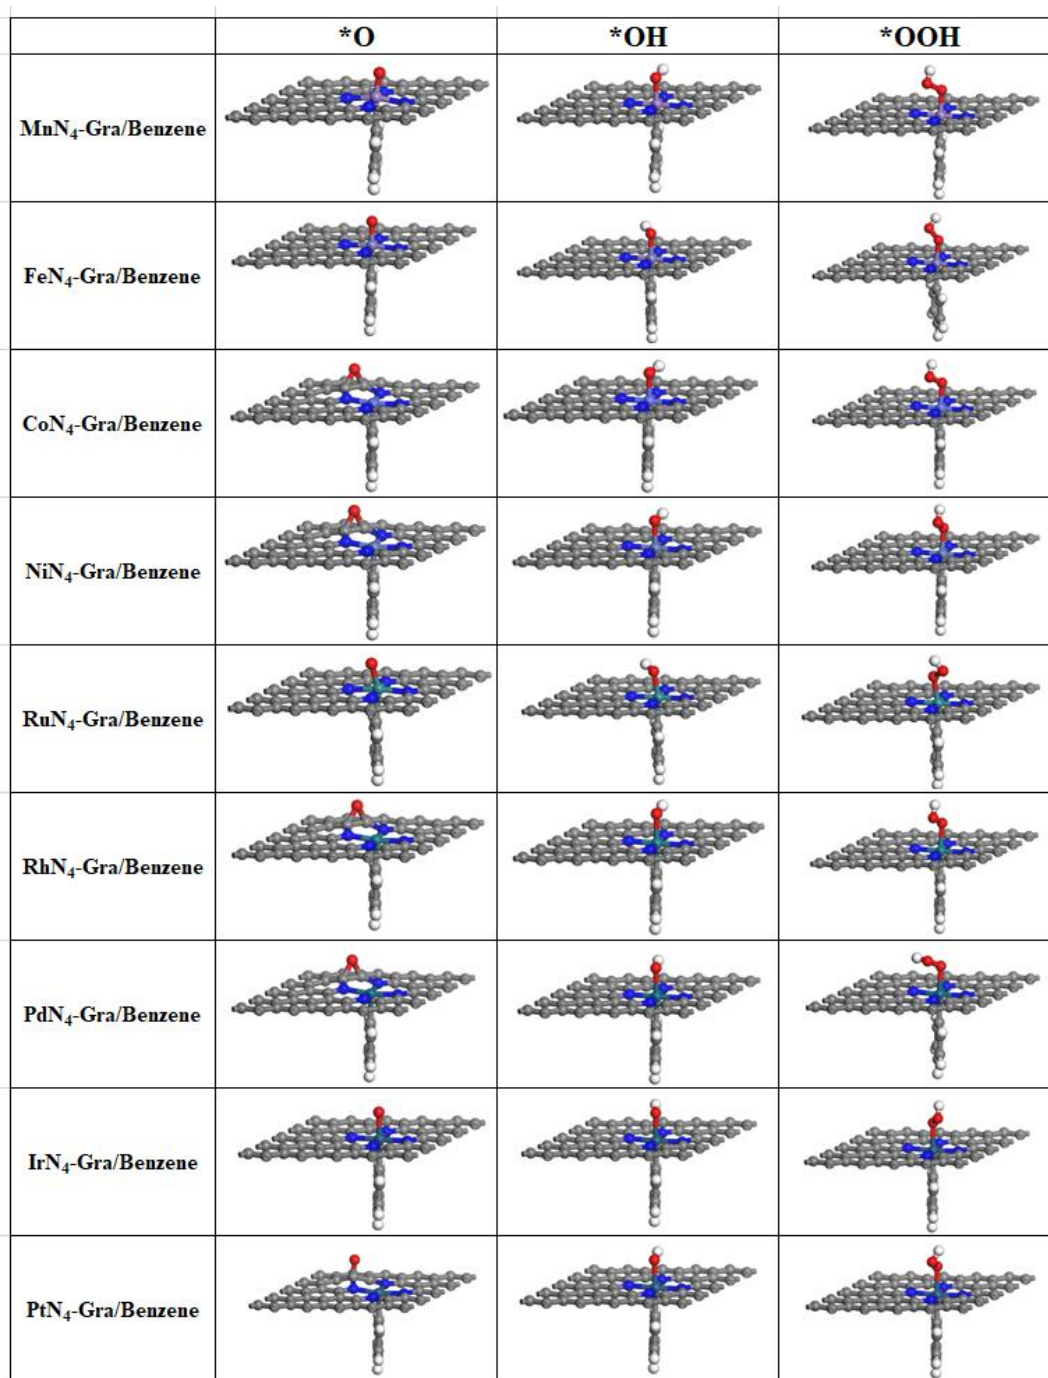

Figure S4. The optimized structures of \*O, \*OH and \*OOH intermediates on the MN<sub>4</sub>-Gra/ben surfaces.

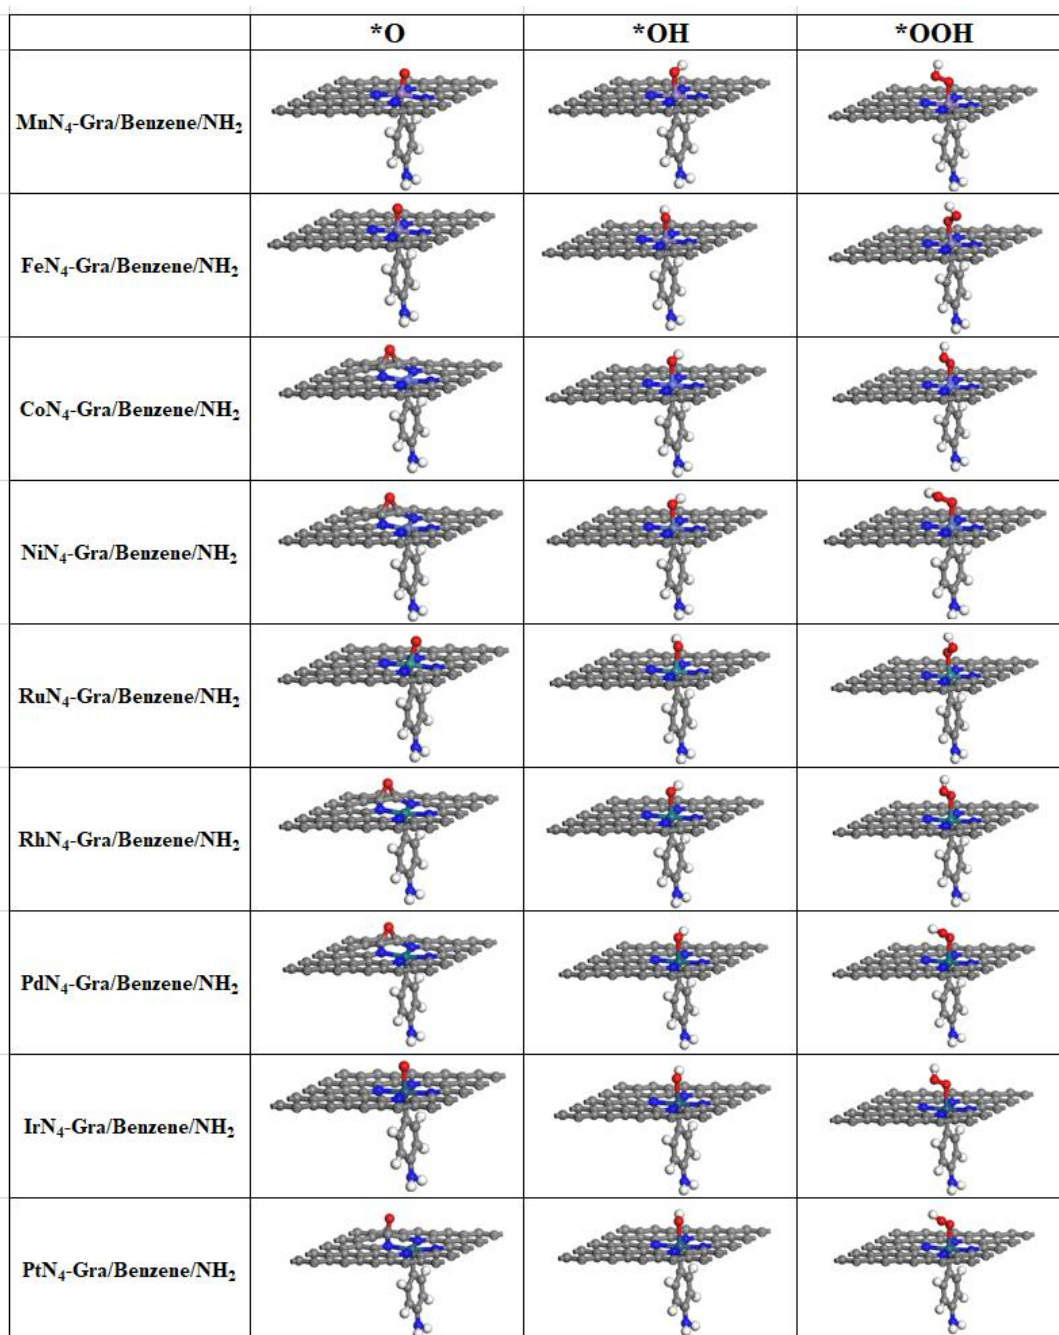

Figure S5. The optimized structures of \*O, \*OH and \*OOH intermediates on the MN<sub>4</sub>-Gra/ben/NH<sub>2</sub> surfaces.

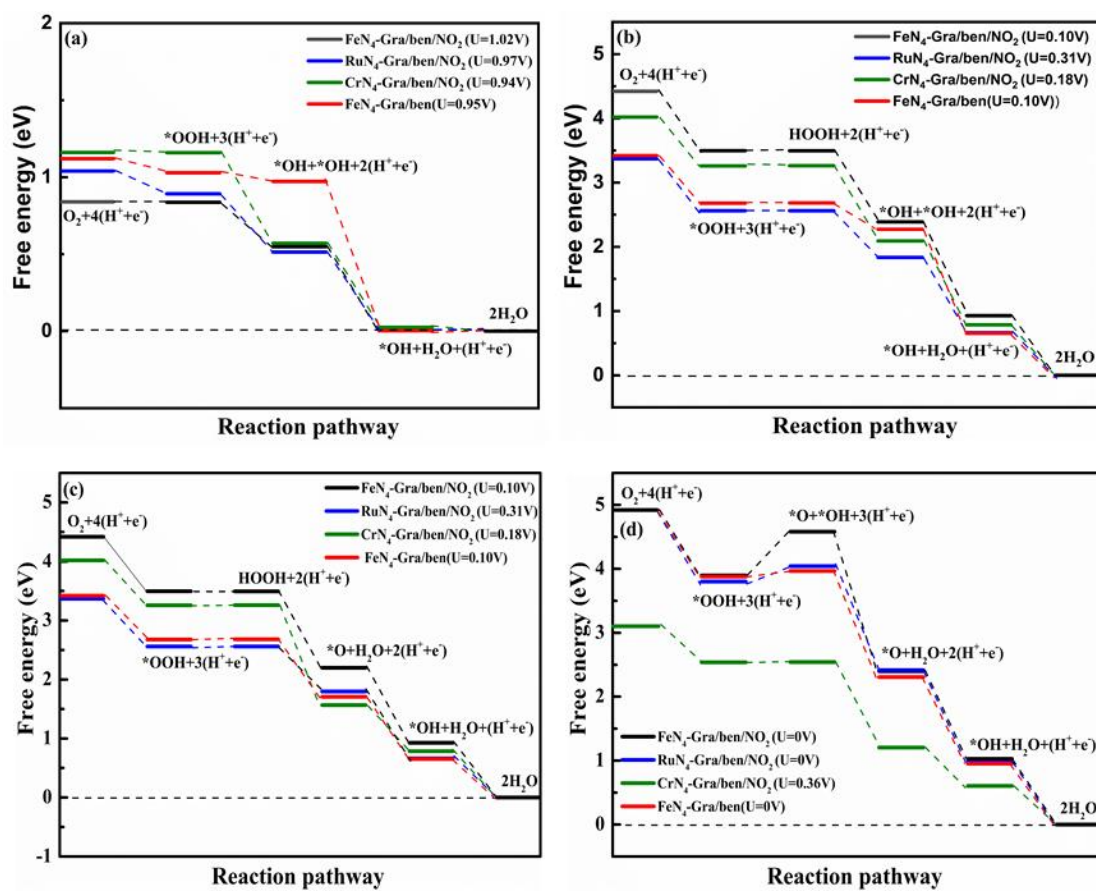

Figure S6. The free energy diagrams of the different ORR pathways for FeN<sub>4</sub>-Gra/ben/NO<sub>2</sub>, RuN<sub>4</sub>-Gra/ben/NO<sub>2</sub>, CrN<sub>4</sub>-Gra/ben/NO<sub>2</sub>, and FeN<sub>4</sub>-Gra/ben.

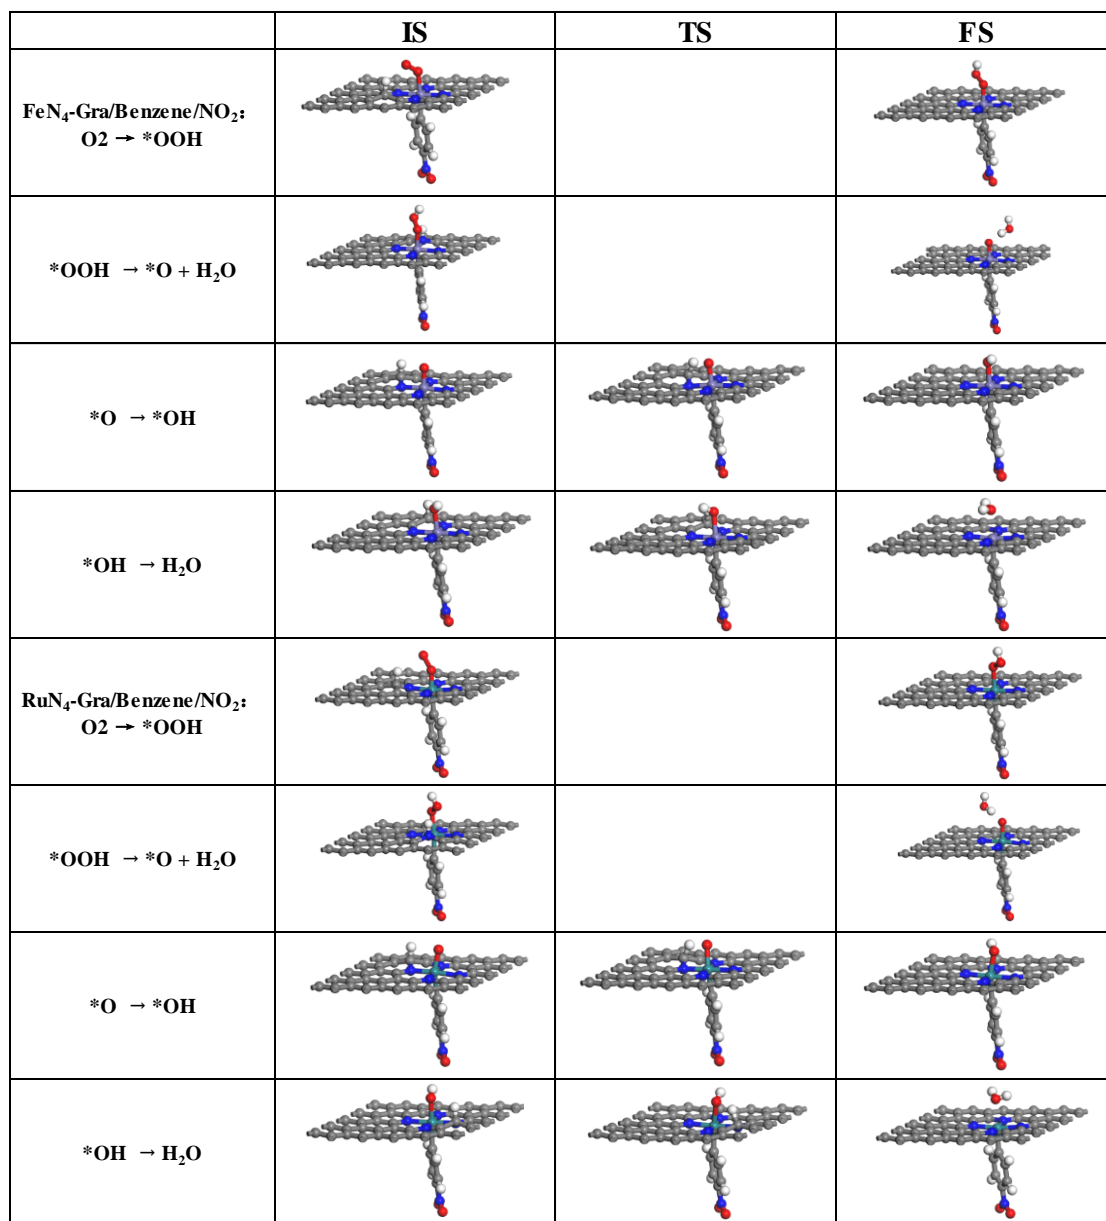

Figure S7. Atomic structures of the initial state (IS), the transition state (TS), and the final state (FS) for ORR on FeN<sub>4</sub>-Gra/ben/NO<sub>2</sub> and RuN<sub>4</sub>-Gra/ben/NO<sub>2</sub>.

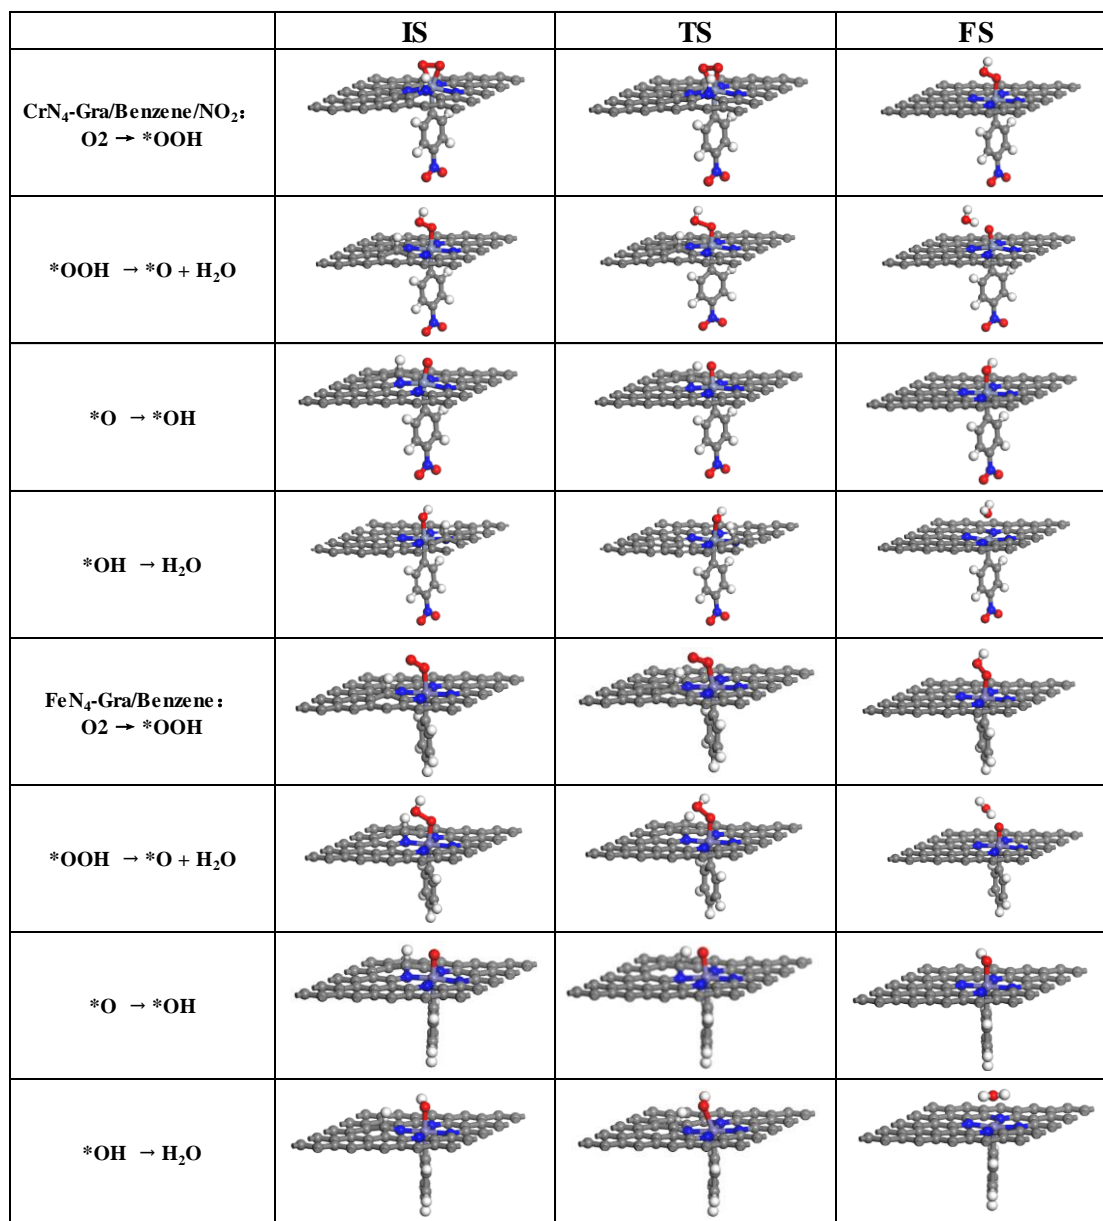

Figure S8. Atomic structures of the initial state (IS), the transition state (TS), and the final state (FS) for ORR on CrN<sub>4</sub>-Gra/ben/NO<sub>2</sub> and FeN<sub>4</sub>-Gra/ben.

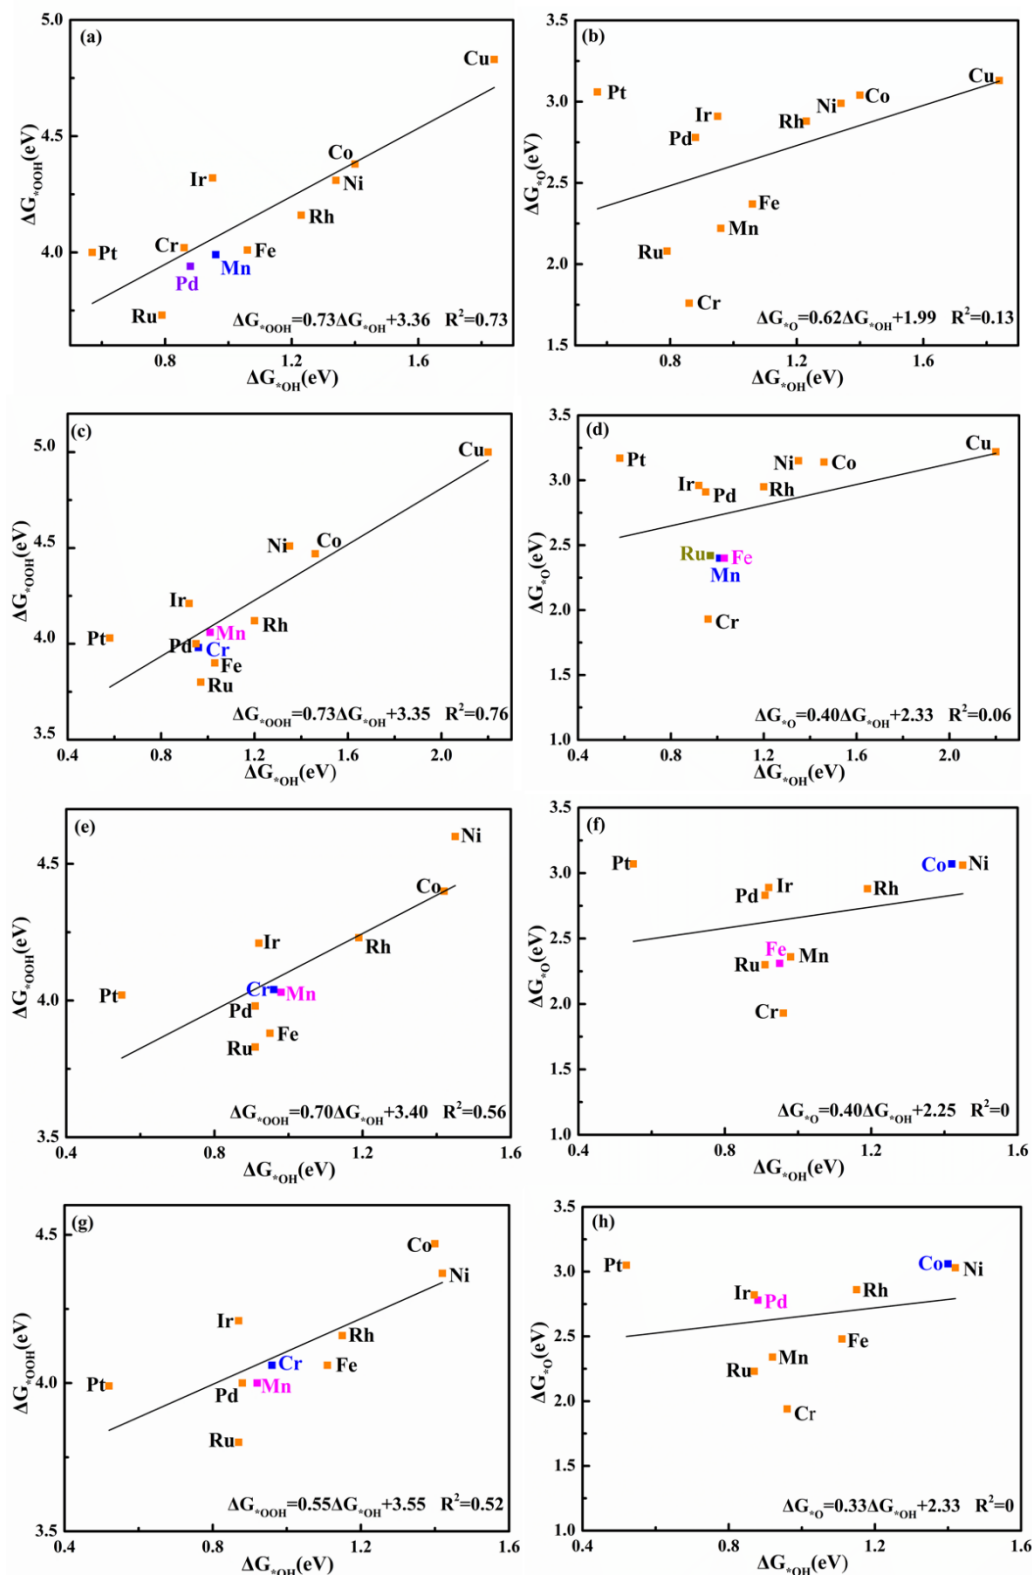

Figure S9. The scaling relationship for Gibbs adsorption free energies of \*OH versus \*OOH and \*OH versus \*O for MN<sub>4</sub>-Gra/CH<sub>3</sub> (a,b) MN<sub>4</sub>-Gra/ben/NO<sub>2</sub> (c,d) MN<sub>4</sub>-Gra/ben (e,f) and MN<sub>4</sub>-Gra/ben/NH<sub>2</sub> (g,h).
